# Supplementary material
Source: ML conference proceedings conference paper supplement (https://proceedings.neurips.cc/paper_files/paper/2022/hash/eb011fd258c763c44d8c6a0e9ce04f17-Abstract.html)
Supplement: Supplementary file 1 [file eb011fd258c763c44d8c6a0e9ce04f17-Supplemental-Datasets_and_Benchmarks.zip]

Archive with 2 entries (2 files):
- Supplementary_Materials/Appendix.pdf
- Supplementary_Materials/Datasheet.pdf
